# Supplementary material for: Impact of reactive surfaces on the abiotic reaction between nitrite and ferrous iron and associated nitrogen and oxygen isotope dynamics
Source: Copernicus journal article supplement (doi:10.5194/bg-17-4355-2020), 2020-08-28
Supplement: Supplementary file 1 [file bg-17-4355-2020-supplement.pdf]

Supplement of Biogeosciences, 17, 4355–4374, 2020  
<https://doi.org/10.5194/bg-17-4355-2020-supplement>  
© Author(s) 2020. This work is distributed under  
the Creative Commons Attribution 4.0 License.

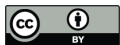

*Supplement of*

## **Impact of reactive surfaces on the abiotic reaction between nitrite and ferrous iron and associated nitrogen and oxygen isotope dynamics**

**Anna-Neva Visser et al.**

*Correspondence to:* Anna-Neva Visser ([a.visser@unibas.ch](mailto:a.visser@unibas.ch))

The copyright of individual parts of the supplement might differ from the CC BY 4.0 License.

1 **S.1. Nernst equation and values used for Pourbaix diagram calculation**

2 Nernst equation:  $Eh = Eh^\circ + \left(\frac{0.59V}{z_e} \log \frac{a_{Ox}}{a_{Red}}\right)$  (2)

3

| Reaction                                                        | Eh° [V] | Source                          |
|-----------------------------------------------------------------|---------|---------------------------------|
| $O_2 + 4H^+ + 4e^- \rightarrow 2H_2O$                           | 1.229   | (Rumble et al., 2012)           |
| $2H^+ + 2e^- \rightarrow H_2$                                   | 0       |                                 |
| $Fe^{3+} + e^- \rightarrow Fe^{2+}$                             | 0.767   | (Cornell and Schwertmann, 2003) |
| $Fe(OH)_{3,s} + 3H^+ + e^- \rightarrow Fe^{2+} + 3H_2O$         | 0.944   |                                 |
| $Fe(OH)_2 + e^- + H^+ \rightarrow Fe^{2+} + H_2O$               | 0.897   |                                 |
| $Fe(OH)_{3,s} + e^- + H^+ \rightarrow Fe(OH)_{2,s} + H_2O$      | 0.254   |                                 |
| $NO_3^- + 2H^+ + 2e^- \rightarrow NO_2^- + H_2O$                | 0.42    | (Berks et al., 1995)            |
| $NO_2^- + 2H^+ + e^- \rightarrow NO + H_2O$                     | 0.375   |                                 |
| $2NO + 2H^+ + 2e^- \rightarrow N_2O + H_2O$                     | 1.175   |                                 |
| $N_2O + 2H^+ + 2e^- \rightarrow N_2 + H_2O$                     | 1.355   |                                 |
| $2NO_3^-(aq) + 4H^+(aq) + 2e^- \rightarrow 2NO_2(g) + 2H_2O(l)$ | 0.8     | <sup>1</sup>                    |

4 1 [http://www2.ucdsb.on.ca/tiss/stretton/database/Standard\\_Reduction\\_Potentials.htm](http://www2.ucdsb.on.ca/tiss/stretton/database/Standard_Reduction_Potentials.htm)

5

6 **S.2. Fe tot concentrations (presented as % of initial)**

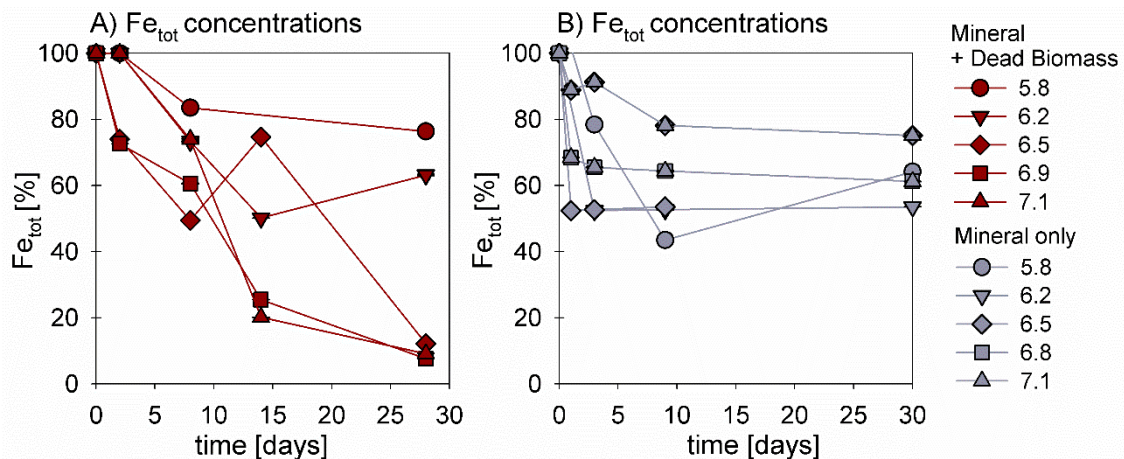

7

8 **Figure 1: Fe total concentrations for the mineral + dead biomass (A) and the mineral only (B) amended experimental**  
9 **sets obtained from the dissolution of the spun-down pellet in 1 M HCl. Standard error is given as error bars. Fe total**  
10 **values decrease over time, suggesting that the classical ferrozine assay approach applied was insufficient**

11 **S.3. 2 mM NO<sub>2</sub><sup>-</sup> as threshold value**

12 Klueglein and Kappler (2013) showed that in the presence and absence of goethite, the oxidation of 8 mM Fe(II)  
13 was enhanced when  $\geq 2$  mM NO<sub>2</sub><sup>-</sup> were added. This and the fact that most NDFeO bacteria tend to accumulate up  
14 to several mM NO<sub>2</sub><sup>-</sup> (Muehe et al., 2009; Weber et al., 2009), which might be a crucial point in order to explain  
15 the possible abiotically driven Fe(II) oxidation in NDFeO bacteria, drove our decision to perform our  
16 experiments at a threshold of 2 mM Fe(II) and NO<sub>2</sub><sup>-</sup>.

17

18 **S.4. N<sub>2</sub>O versus nitrite concentrations**

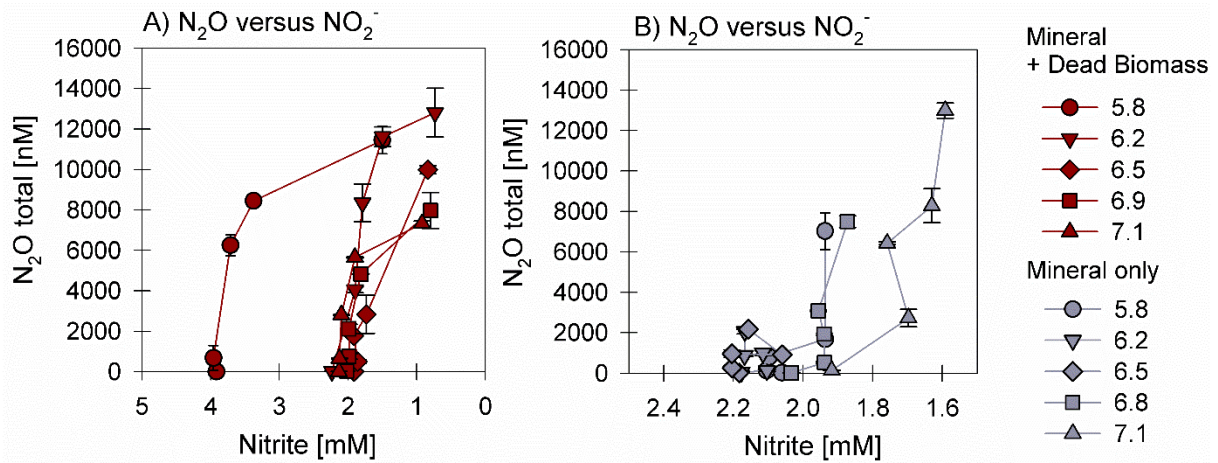

19

20 **Figure 2: N<sub>2</sub>O versus NO<sub>2</sub><sup>-</sup> concentrations for the mineral + dead biomass (A) and the mineral-only (B) experiments.**  
 21 **Standard error is represented by the error bars.**

22

23 **S.5. Rayleigh plots for mineral only setups**

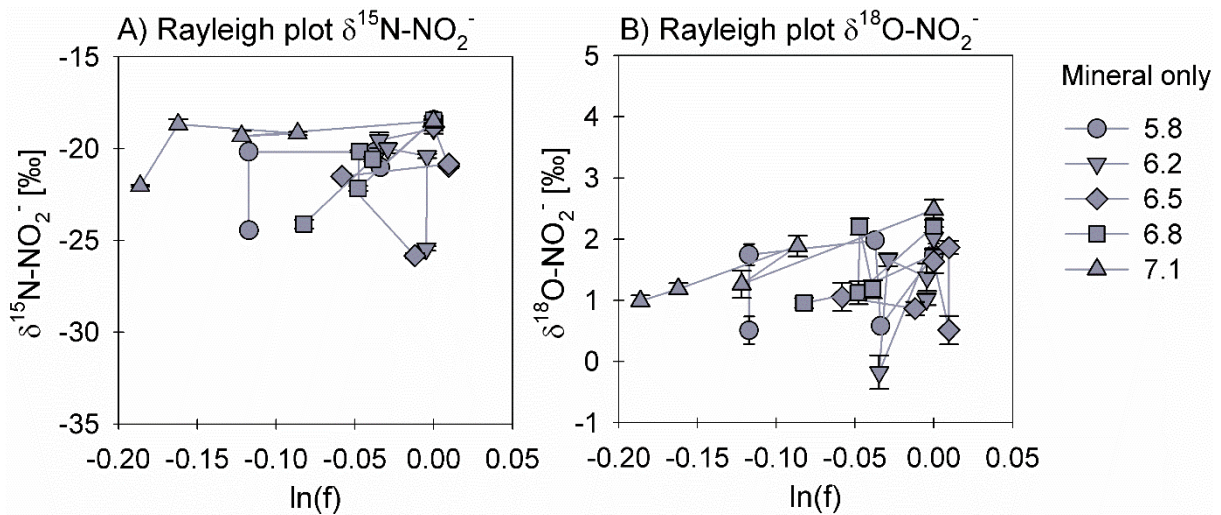

24

25 **Figure 3: Rayleigh plots for δ<sup>15</sup>N- (A) and δ<sup>18</sup>O- (B) NO<sub>2</sub><sup>-</sup> values obtained from the mineral-only experiments. Standard**  
 26 **error is represented by the error bars. Results obtained do not follow classical Rayleigh fractionation patterns since the**  
 27 **concentrations did not decrease significantly over time.**

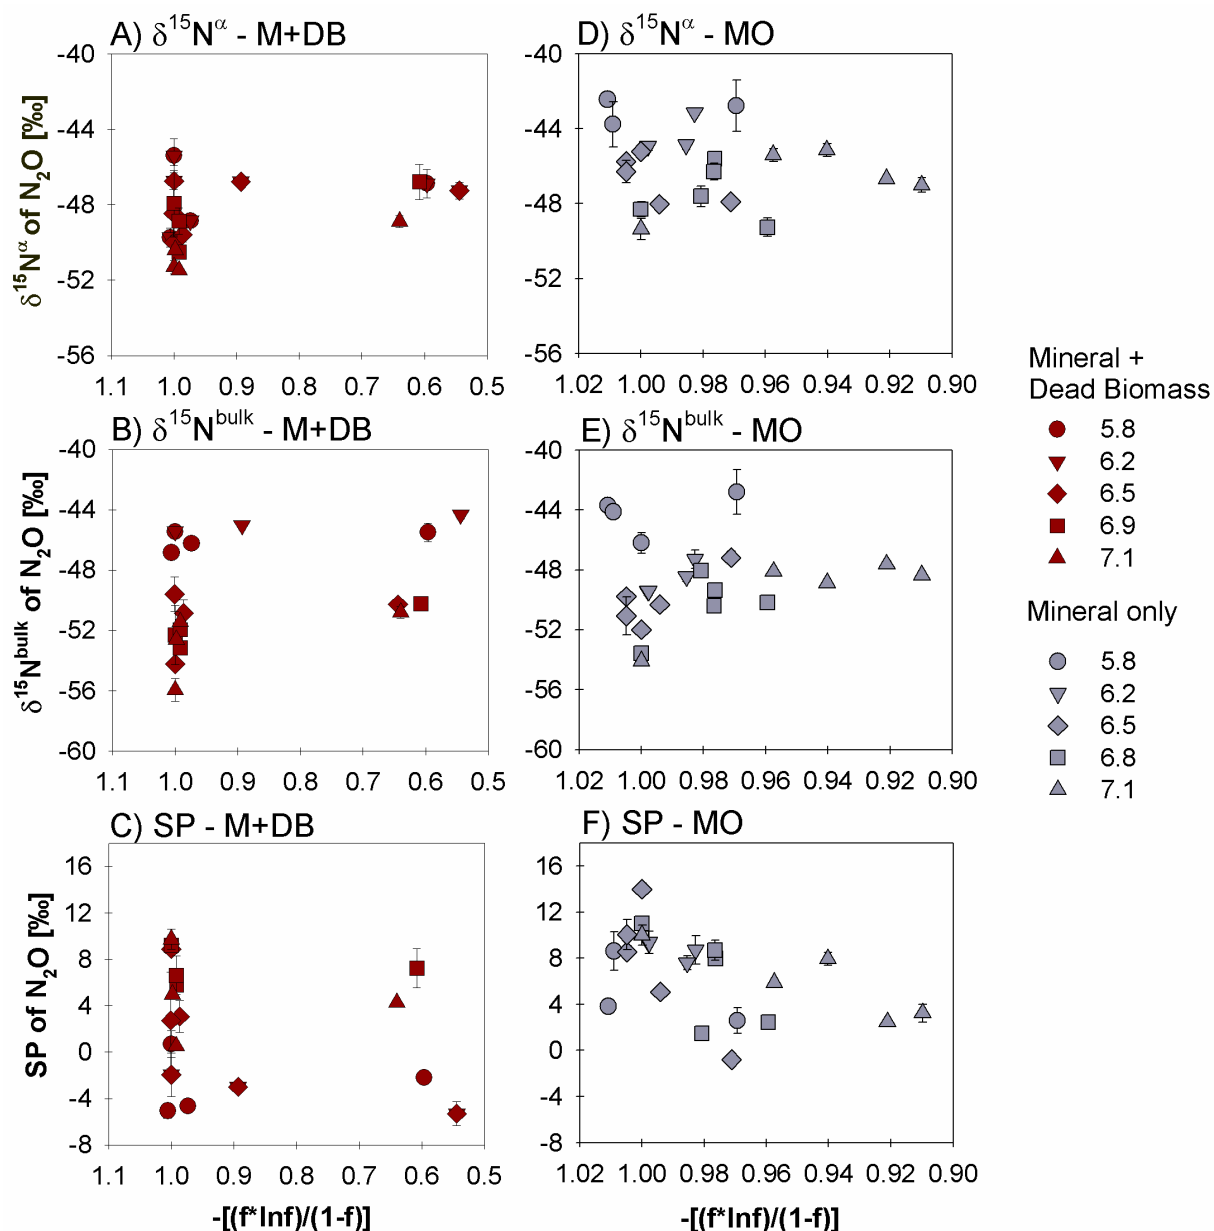

29  
 30 **Figure 4:** Rayleigh plots for  $\text{N}_2\text{O}$   $\delta^{15}\text{N}^\alpha$  (A, D),  $\delta^{15}\text{N}^{\text{bulk}}$  (B, E) and site preference, SP (C, F) in mineral plus dead biomass  
 31 (MDB, red) and mineral-only (MO, grey) experiments. Standard error calculated from biological replicates ( $n = 3$  or  $2$ )  
 32 is represented by the error bars.

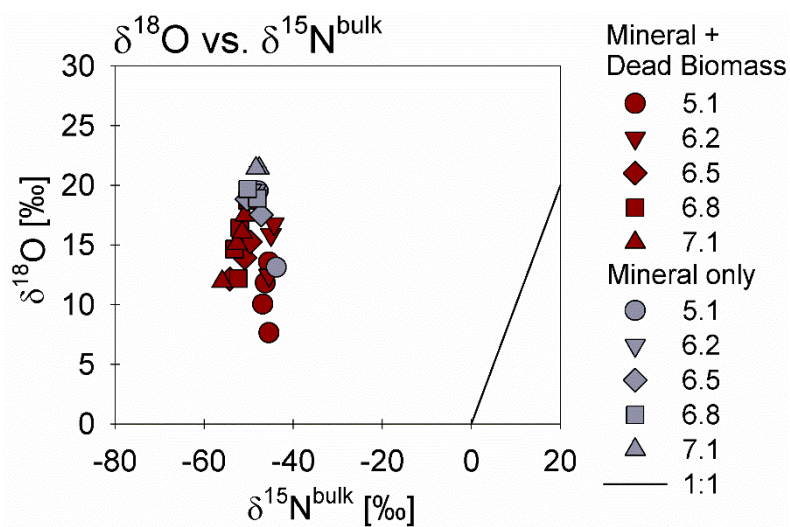

34  
 35 **Figure 5:  $\delta^{18}\text{O}$  vs  $\delta^{15}\text{N}^{\text{bulk}}$  in  $\text{N}_2\text{O}$  combined plot for mineral + dead biomass amended experiments (red) and mineral**  
 36 **only experiments (grey). Standard error is represented by the error bars.**
